# Supplementary material
Source: publisher figshare collection journal article supplement (https://tandf.figshare.com/articles/dataset/_/6953348)

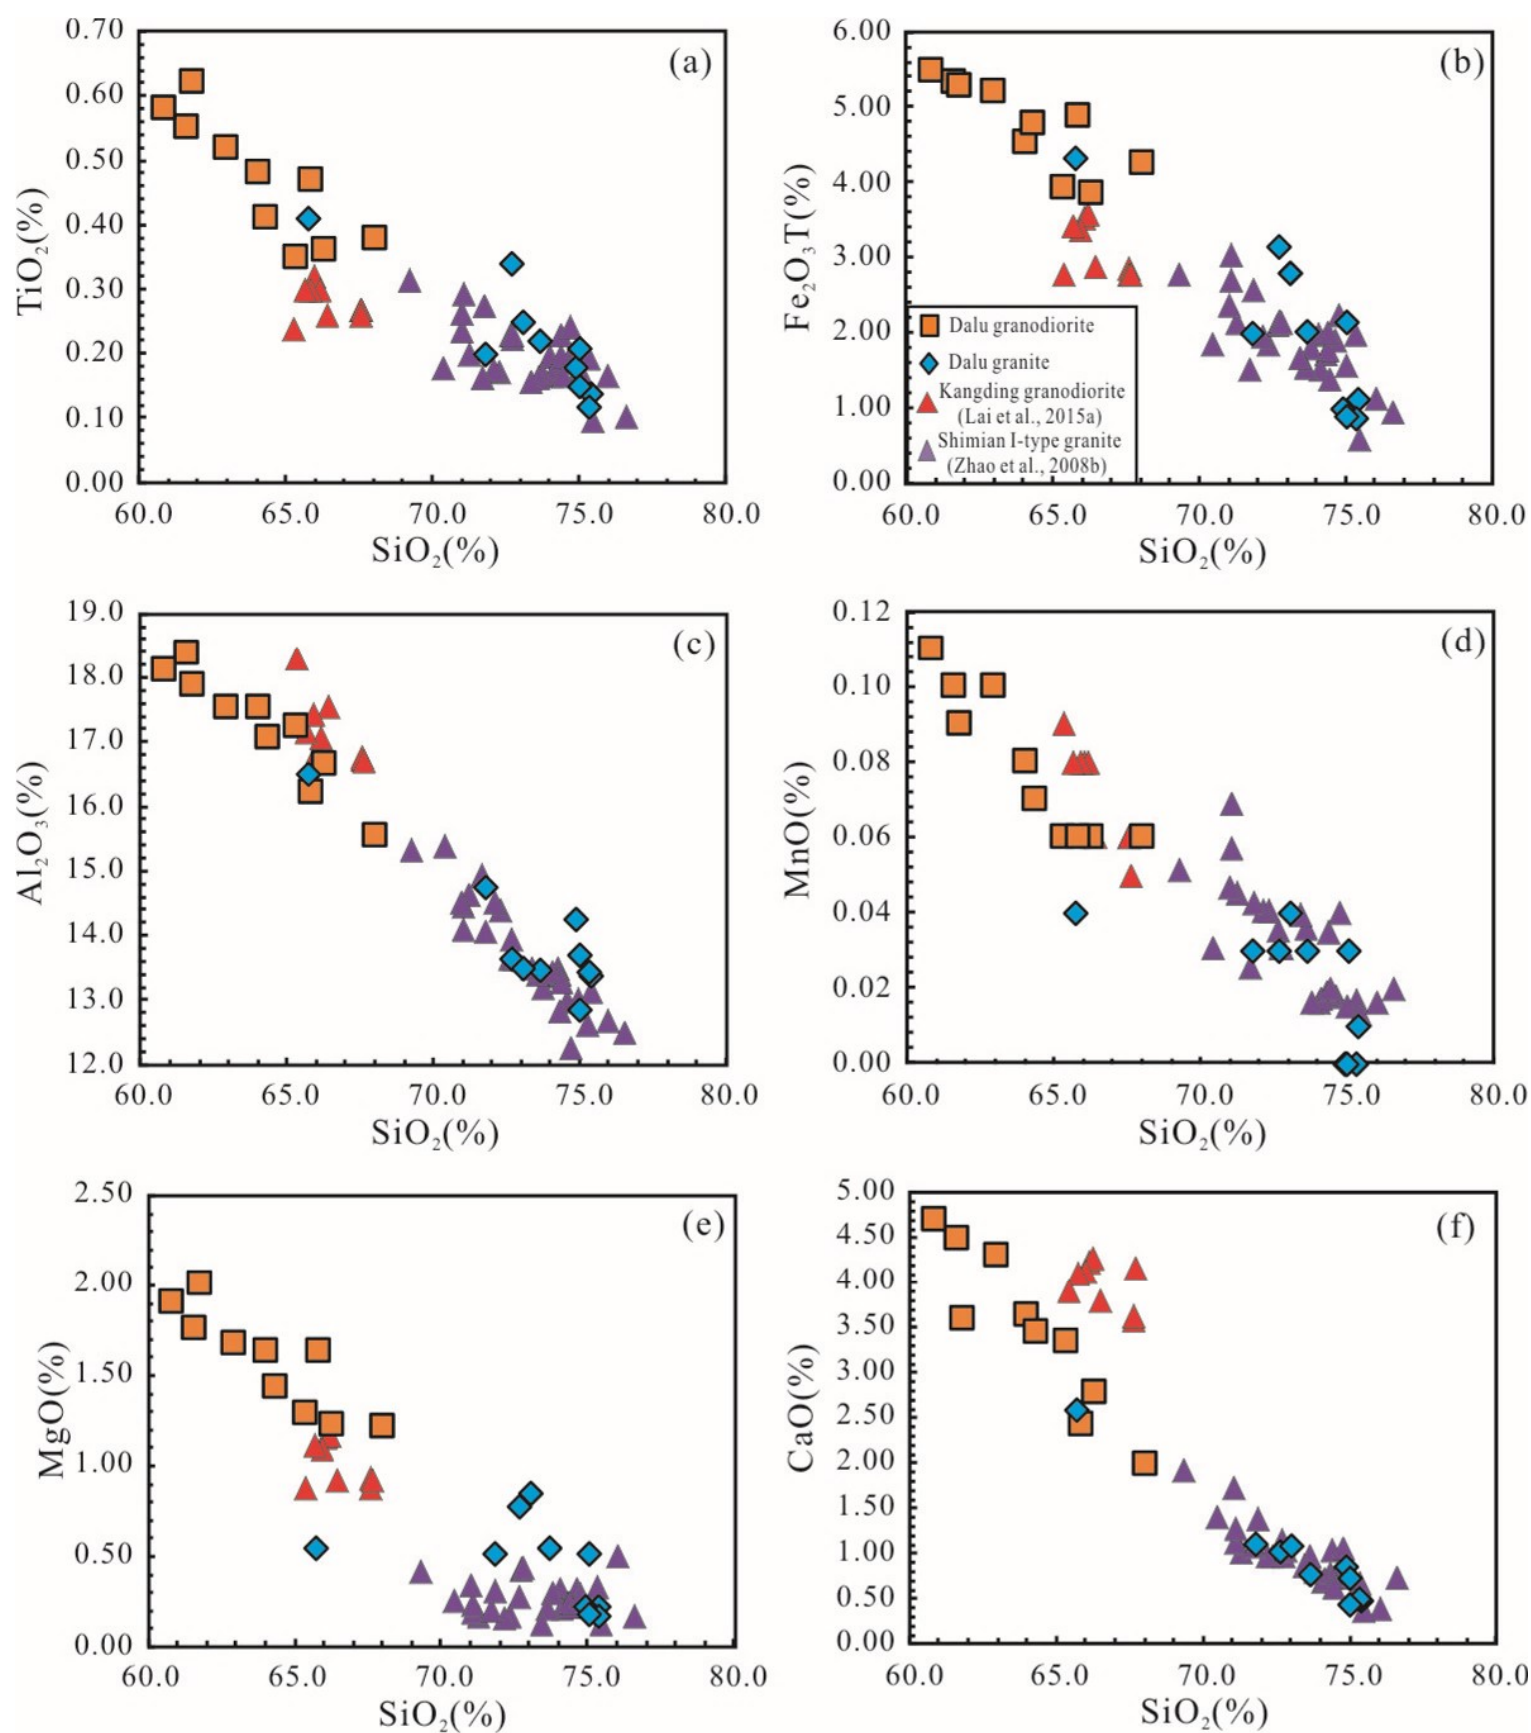

Supplementary Fig. 2

Supplement: Supplementary file 1 [file 1]

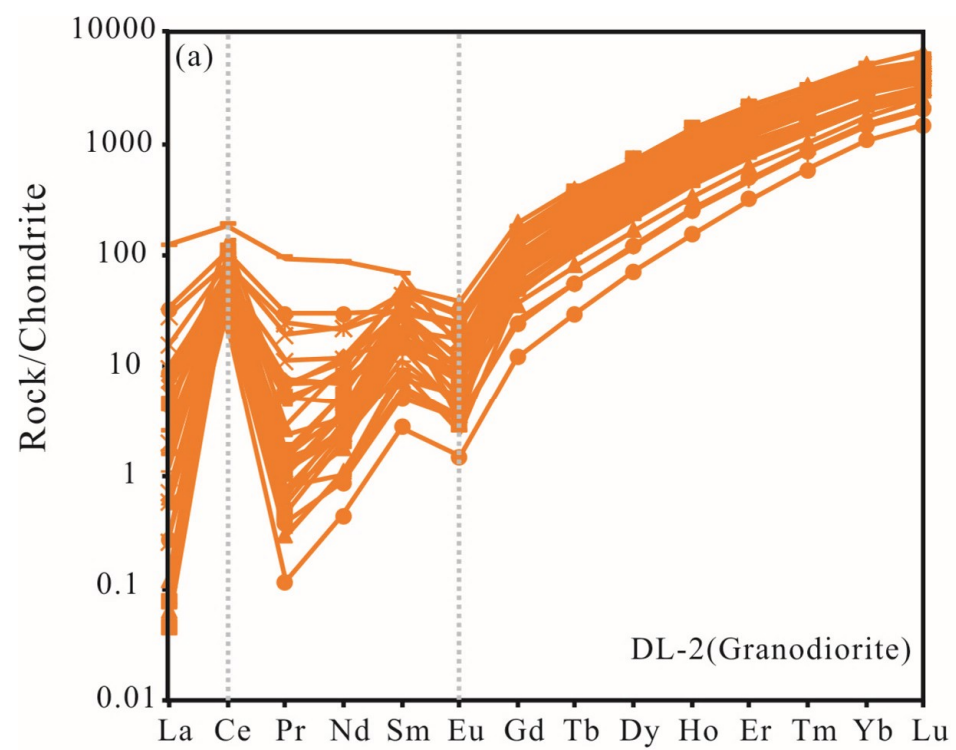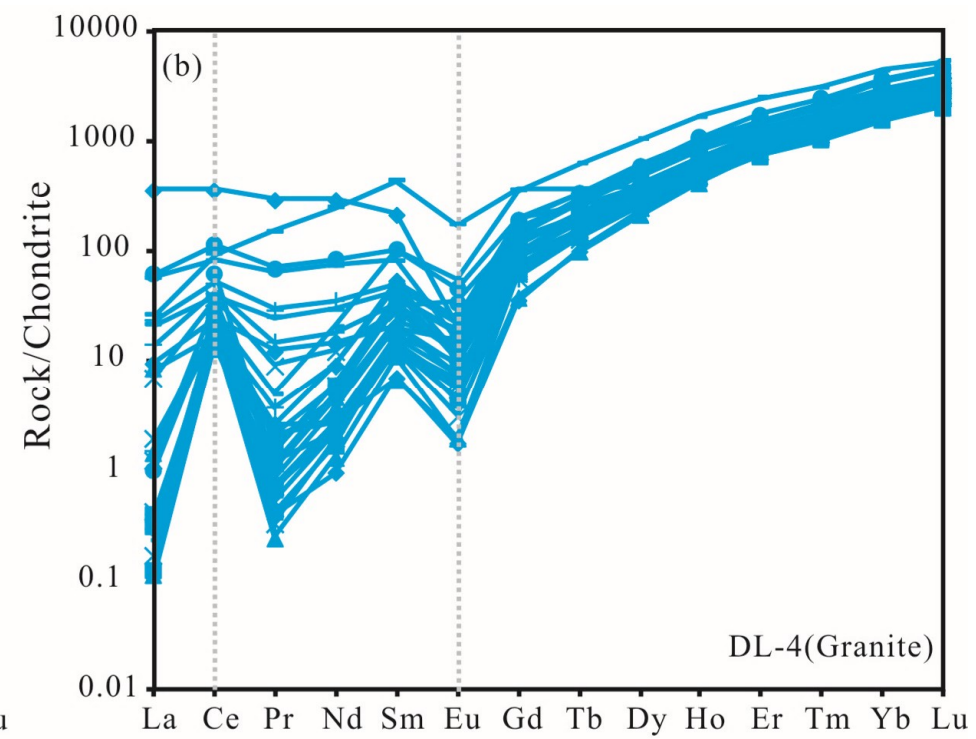

Supplementary Fig.1

Supplement: Supplementary file 2 [file 1]

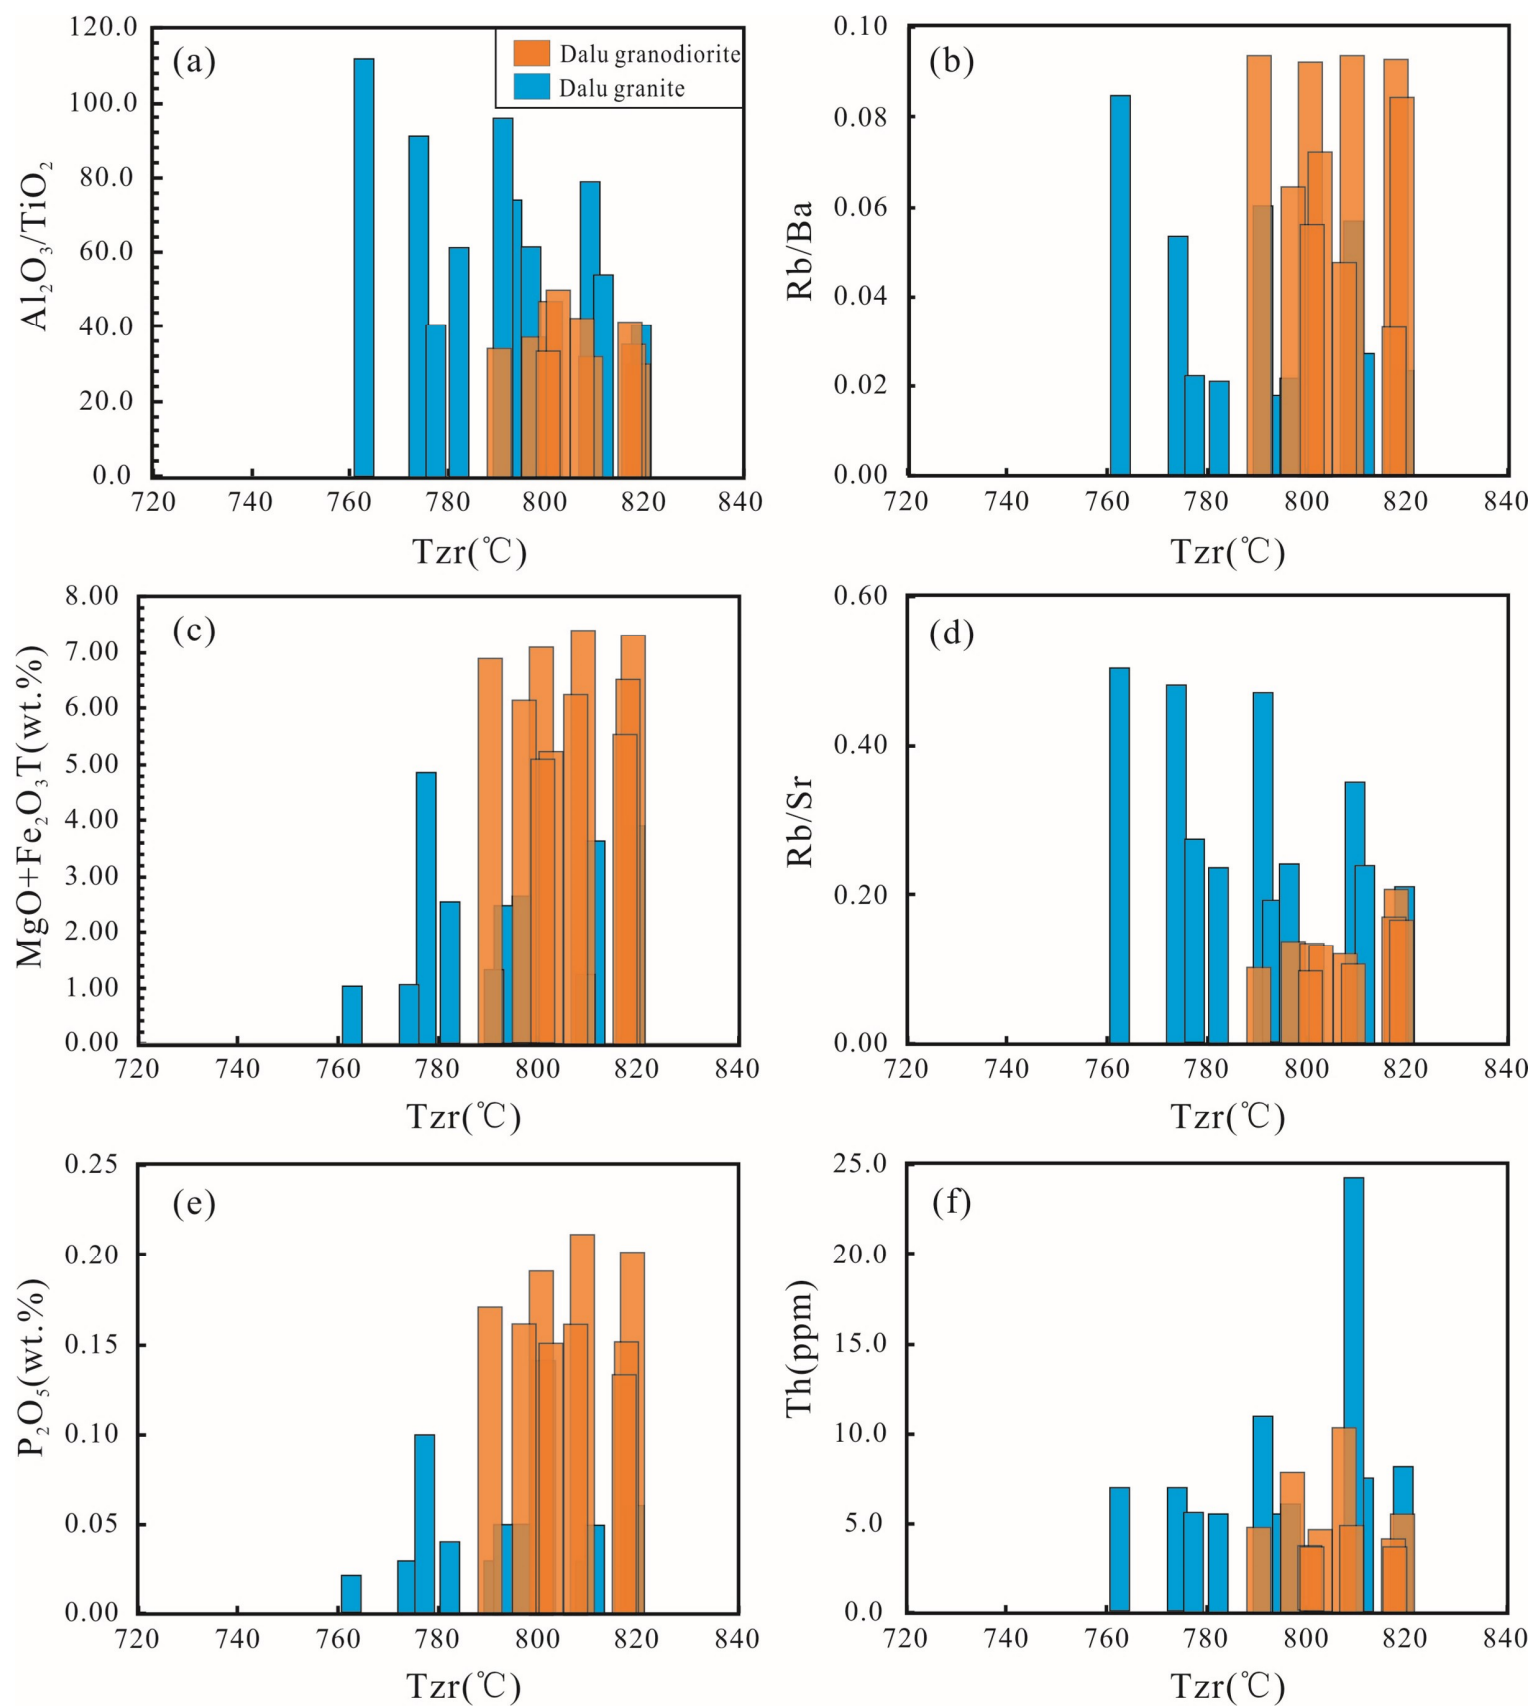

Supplementary Fig. 3

Supplement: Supplementary file 3 [file 1]
